# Supplementary material for: Anti-Zika virus and anti-Usutu virus activity of human milk and its components
Source: PubMed Central journal article supplement (PMC7571670; doi:10.1371/journal.pntd.0008713), 2020-10-07

**A**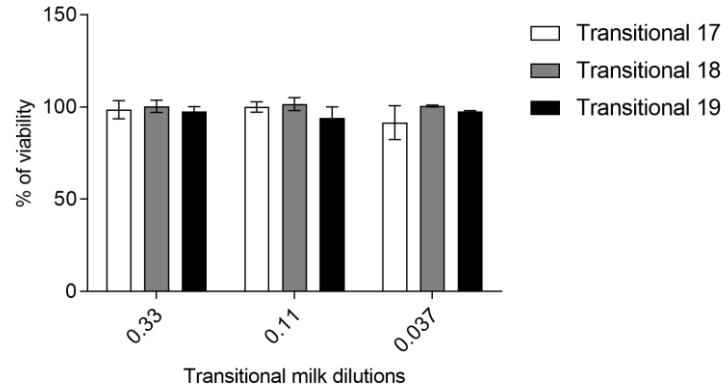**B**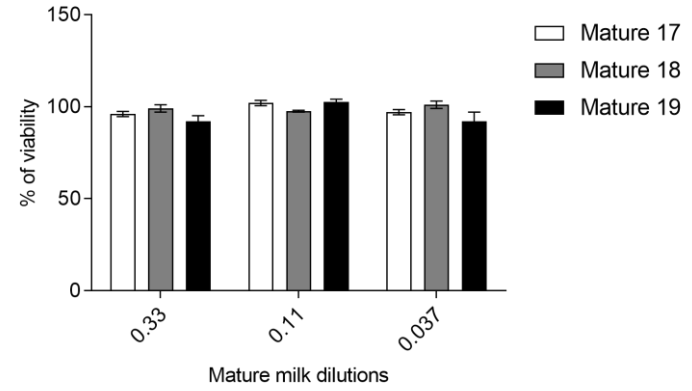**C**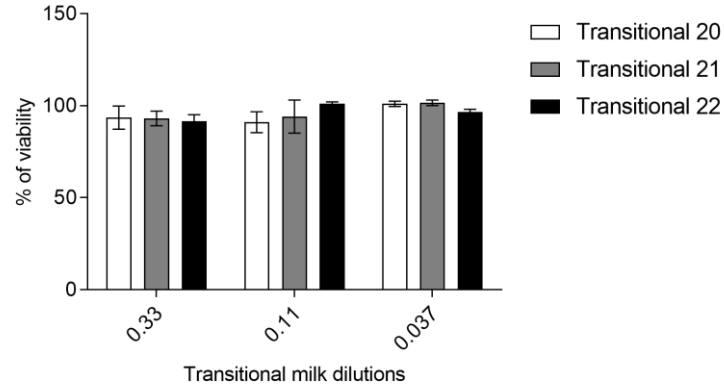**D**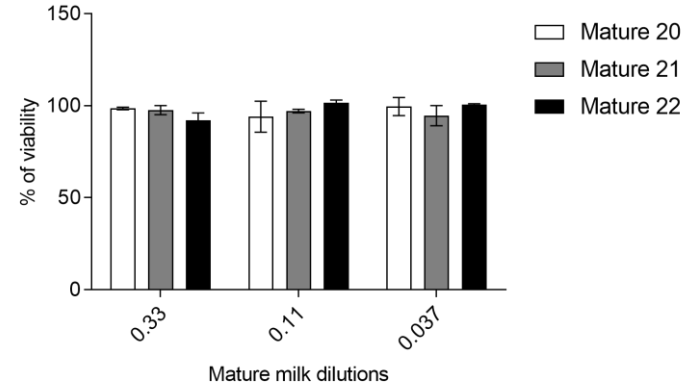

Supplement: pntd.0008713.s008.pdf [file pntd.0008713.s008.pdf]
